# Supplementary material for: Neighborhood Prices of Healthier and Unhealthier Foods and Associations with Diet Quality: Evidence from the Multi-Ethnic Study of Atherosclerosis
Source: MDPI journal article supplement (doi:10.3390/ijerph14111394), 2017-11-16

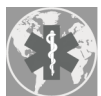

# Supplementary Materials: Neighborhood Prices of Healthier and Unhealthier Foods and Associations with Diet Quality: Evidence from the Multi-Ethnic Study of Atherosclerosis

David M. Kern <sup>1</sup>, Amy H. Auchnicloss <sup>1,\*</sup>, Mark F. Stehr <sup>2</sup>, Ana V. Diez Roux <sup>3</sup>, Latetia V. Moore <sup>4</sup>, Genevieve P. Kanter <sup>5</sup> and Lucy F. Robinson <sup>1</sup>

**Table S1.** Serving sizes and weights for composite price calculations using two different weight calculations—based on national consumption averages and using equal weights within each food class.

| Column Heading                     | Products Included                                                                | Serving Size | Servings Per Day | Weight <sup>a</sup> | Weight <sup>b</sup> |
|------------------------------------|----------------------------------------------------------------------------------|--------------|------------------|---------------------|---------------------|
| Healthier foods                    |                                                                                  |              |                  |                     |                     |
| Fruits and vegetables <sup>c</sup> | Orange juice, frozen vegetables<br>1%, 2% and non-fat refrigerated milk; low fat | 1 cup        | 2.63             | 0.617               | 0.50                |
| Dairy <sup>d</sup>                 | and non-fat yogurt; and 1%, 2%, and 4%<br>milkfat cottage cheese                 | 8 fl oz      | 1.63             | 0.383               | 0.50                |
| Unhealthy foods                    |                                                                                  |              |                  |                     |                     |
| Soda <sup>e</sup>                  | Sugar sweetened only                                                             | 8 fl oz      | 0.73             | 0.450               | 0.33                |
| Sweets <sup>f,g</sup>              | Chocolate candy, cookies                                                         | 30 g/40 g    | 0.62             | 0.383               | 0.33                |
| Salty snacks <sup>h</sup>          | Chips, pretzels, tortilla chips, etc.                                            | 30 g         | 0.27             | 0.167               | 0.33                |

<sup>a</sup> Weight based on national consumption averages (servings per day column); <sup>b</sup> Equal weight given to all products in their respective class; <sup>c</sup> NHANES 2011–2012 survey found adults 20 years and older consumed 1.64 cups of vegetables per day and 0.99 cups of fruit per day (United States Department of Agriculture and Agricultural Research Service, 2014); <sup>d</sup> NHANES 2011–2012 survey found adults 20 years and older consumed 1.63 cups of dairy per day. (United States Department of Agriculture and Agricultural Research Service, 2014); <sup>e</sup> Adults ≥60 years old consume 68 calories from SSBs on a daily basis. (Kit et al., 2013) A 12 ounce can of Coca-Cola contains 140 calories, (Coca-Cola, 2014) thus 68 calories equates to 5.8 ounces, or 0.73 daily servings; <sup>f</sup> According to a Canadian agriculture report, 2010 cookie sales was 1 million tons in the United States, (Agriculture and Agri-food Canada, 2012) which equates to 0.27 servings per day; <sup>g</sup> According to the latest report from the International Cocoa Organization, in 2008 Americans consumed 5.09 kilograms of chocolate on average, roughly 11.2 pounds, which equates to 0.49 ounces per day, or 0.35 servings. (International Cocoa Organization); <sup>h</sup> A 2004 report from the USDA found that 95.5% of households consumed any chips (potato, corn, etc.) and of those that did eat chips they consumed 7.0 pounds per capita. (Kuchler et al., 2004) After accounting for those that did not buy any chips this becomes 6.7 pounds per capita annually, 0.29 ounces per day, or 0.27 servings; Abbreviations: g = grams, fl oz = fluid ounces.

**Table S2.** Characteristics of included and excluded individuals in the analysis of diet quality.

| Column Heading                                 | Included Participants |          | Excluded Individuals |        |
|------------------------------------------------|-----------------------|----------|----------------------|--------|
|                                                | N/Mean                | Col %/SD | n/Mean               | %/SD   |
| Number of participants (N)                     | 2765                  |          | 1951                 |        |
| MESA recruitment site (n, %) <sup>a</sup>      |                       |          |                      |        |
| Forsyth County, NC                             | 539                   | 19.5%    | 274                  | 14.0%  |
| New York, NY                                   | 538                   | 19.5%    | 272                  | 13.9%  |
| Baltimore, MD                                  | 464                   | 16.8%    | 194                  | 9.9%   |
| St. Paul, MN                                   | 8                     | 0.3%     | 763                  | 39.1%  |
| Chicago, IL                                    | 651                   | 23.5%    | 225                  | 11.5%  |
| Los Angeles, CA                                | 565                   | 20.4%    | 223                  | 11.4%  |
| Region of residence (n, %)                     |                       |          |                      |        |
| Northeast                                      | 534                   | 19.3%    | 241                  | 13.0%  |
| Midwest                                        | 642                   | 23.2%    | 937                  | 50.5%  |
| South                                          | 1021                  | 36.9%    | 452                  | 24.3%  |
| West                                           | 568                   | 20.5%    | 227                  | 12.2%  |
| Total supermarket density (3 mile) (mean, SD)  | 1.19                  | 1.42     | 0.79                 | 1.19   |
| Female (n, %)                                  | 1466                  | 53.0%    | 1048                 | 53.7%  |
| Age (mean, SD)                                 | 70.3                  | 9.5      | 69.4                 | 9.5    |
| Race/ethnicity (n, %)                          |                       |          |                      |        |
| White                                          | 1101                  | 39.8%    | 824                  | 42.2%  |
| Chinese American                               | 359                   | 13.0%    | 182                  | 9.3%   |
| Black                                          | 834                   | 30.2%    | 417                  | 21.4%  |
| Hispanic                                       | 471                   | 17.0%    | 528                  | 27.1%  |
| Education (n, %)                               |                       |          |                      |        |
| High school diploma or less                    | 777                   | 28.1%    | 718                  | 36.8%  |
| Some college                                   | 761                   | 27.5%    | 610                  | 31.3%  |
| Bachelor's degree or more                      | 1227                  | 44.4%    | 615                  | 31.5%  |
| Per capita household income (in \$10k)         | 2.6                   | 1.9      | 2.3                  | 1.7    |
| Wealth index                                   | 2.6                   | 1.2      | 2.5                  | 1.2    |
| Income/wealth index                            | 5.1                   | 2.2      | 4.8                  | 2.2    |
| Marital status (n, %)                          |                       |          |                      |        |
| Not married or living with partner             | 1107                  | 40.0%    | 825                  | 42.3%  |
| Married/Living with partner                    | 1658                  | 60.0%    | 1126                 | 57.7%  |
| BMI (mean, SD)                                 | 28.2                  | 5.6      | 28.9                 | 5.7    |
| <25 (n, %)                                     | 855                   | 30.9%    | 512                  | 26.2%  |
| 25–29.9 (n, %)                                 | 1043                  | 37.7%    | 710                  | 36.4%  |
| ≥30 (n, %)                                     | 867                   | 31.4%    | 729                  | 37.4%  |
| Smoking status (n, %)                          |                       |          |                      |        |
| Never smoked                                   | 1281                  | 46.3%    | 841                  | 43.1%  |
| Former smoker                                  | 1283                  | 46.4%    | 938                  | 48.1%  |
| Current smoker                                 | 201                   | 7.3%     | 172                  | 8.8%   |
| Physical activity, MET min per week (mean, SD) | 2773.7                | 3552.0   | 2548.0               | 3366.9 |

<sup>a</sup> This is the MESA location of the participant, not necessarily their area of residence.

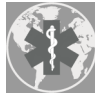

**Table S3.** Results of sensitivity analyses using equal weights for the price outcomes, using a five-mile radius to capture prices for all individuals, and using a one-mile radius for those living in New York City and a three-mile radius for all others.

| Column Heading                                                                  | Exposure of Interest       |       |       |         |                    |       |       |         |                      |       |       |         |
|---------------------------------------------------------------------------------|----------------------------|-------|-------|---------|--------------------|-------|-------|---------|----------------------|-------|-------|---------|
|                                                                                 | Healthy-To-Unhealthy Ratio |       |       |         | Healthy Food Price |       |       |         | Unhealthy Food Price |       |       |         |
|                                                                                 | 95% CI                     |       |       |         |                    |       |       |         |                      |       |       |         |
|                                                                                 | Odds Ratio                 | Lower | Upper | p Value | Odds Ratio         | Lower | Upper | p Value | Odds Ratio           | Lower | Upper | p Value |
| <b>Using equal weights for food prices <sup>a</sup></b>                         |                            |       |       |         |                    |       |       |         |                      |       |       |         |
| Model 1: region, age, gender                                                    | 0.92                       | 0.76  | 1.11  | 0.3905  | 0.96               | 0.86  | 1.09  | 0.552   | 1.00                 | 0.92  | 1.10  | 0.9625  |
| Model 2: Model 1 plus income/wealth, education level, smoking status, and race  | 0.84                       | 0.69  | 1.03  | 0.0869  | 0.97               | 0.86  | 1.10  | 0.6684  | 1.02                 | 0.93  | 1.12  | 0.6297  |
| Final Model: Model 2 plus neighborhood SES and neighborhood supermarket density | 0.72                       | 0.57  | 0.91  | 0.0051  | 1.05               | 0.90  | 1.23  | 0.5163  | 1.16                 | 1.01  | 1.32  | 0.0314  |
| <b>Using a 5-mile radius for food prices <sup>b</sup></b>                       |                            |       |       |         |                    |       |       |         |                      |       |       |         |
| Model 1: region, age, gender                                                    | 1.01                       | 0.84  | 1.21  | 0.9487  | 0.97               | 0.85  | 1.10  | 0.6063  | 0.98                 | 0.88  | 1.09  | 0.6974  |
| Model 2: Model 1 plus income/wealth, education level, smoking status, and race  | 0.83                       | 0.68  | 1.01  | 0.0562  | 0.95               | 0.83  | 1.07  | 0.3860  | 1.01                 | 0.91  | 1.13  | 0.8417  |
| Final Model: Model 2 plus neighborhood SES and neighborhood supermarket density | 0.78                       | 0.63  | 0.96  | 0.0216  | 0.93               | 0.79  | 1.10  | 0.4071  | 1.05                 | 0.91  | 1.21  | 0.5231  |
| <b>Using a 1-mile radius for those in NYC <sup>c</sup></b>                      |                            |       |       |         |                    |       |       |         |                      |       |       |         |
| Model 1: region, age, gender                                                    | 0.98                       | 0.85  | 1.14  | 0.8098  | 1.01               | 0.88  | 1.16  | 0.8980  | 1.03                 | 0.91  | 1.15  | 0.6798  |
| Model 2: Model 1 plus income/wealth, education level, smoking status, and race  | 0.89                       | 0.76  | 1.04  | 0.1447  | 0.98               | 0.85  | 1.13  | 0.7611  | 1.06                 | 0.93  | 1.19  | 0.3815  |
| Final Model: Model 2 plus neighborhood SES and neighborhood supermarket density | 0.86                       | 0.73  | 1.01  | 0.0608  | 0.97               | 0.83  | 1.13  | 0.6957  | 1.07                 | 0.94  | 1.22  | 0.2792  |

<sup>a</sup> Each of the two healthy food products (fruits & vegetables, dairy) received a weight of 0.5, while each of the three unhealthy products (soda, chocolate candy & sweets, salty snacks) received a weight of 0.33. The radius for capturing prices remained at three miles for this sensitivity analysis; <sup>b</sup> All IRI supermarkets within five miles of a participant's place of residence at exam 5 were included.

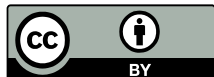

Supplement: s1 [file s1]
